# Supplementary material for: Whole genome sequencing of live attenuated bovine adenovirus type 7 vaccine strain TS-GT reveals biomarkers for virulence attenuation
Source: Research Square preprint supplement (doi:10.21203/rs.3.rs-276827/v1), 2021-03-11
Supplement: Supplementary file 1 [file d5e7ba90ee78717278abeb4e.xlsx]

## Sheet: Table1
Table 1. Location, genomic position and specfication of the five nucleotide changes in the TS-GT genome compared with the sequence of prototype Fukuroi. Amino acid changes are also shown.
Location (nt)	Genomic position	Specification	Amino acid changes
14	5' ITR	Deletion (thymine)	-
13685	non-coding region	Insertion (adenine)	-
14234	coding region of pVI	Mutation (from thymine to adenine)	K96N
29999	3' ITR	19 bp insertion (AGCCACGCCCAAAACTGTC)	-
30021	3' ITR	Deletion (adenine)	-
